# 1 Unique protein features of SARS-CoV-2 relative to other *Sarbecoviruses*

2

3

4 Matthew Cotten<sup>1,2</sup>, David L. Robertson<sup>2</sup>, My V.T. Phan<sup>1</sup>

5

## 6 Affiliations

7 1. MRC/UVRI & LSHTM Uganda Research Unit, Entebbe, Uganda

8 2. MRC-University of Glasgow Centre for Virus Research, Glasgow, UK

9 Correspondence: Matthew Cotten (Matthew.Cotten@lshtm.ac.uk)

10 **Keywords:** SARS-CoV-2, proteome changes, *Sarbecovirus* evolution, spike protein changes

11

## 12 Abstract

13 Defining the unique protein features of SARS-CoV-2, the viral agent causing Coronavirus  
14 Disease 2019, may guide efforts to control this pathogen. We examined proteins encoded by the  
15 *Sarbecoviruses* closest to SARS-CoV-2 using profile Hidden Markov Model similarities to identify  
16 features unique to SARS-CoV-2. Consistent with previous reports, a small set of bat and pangolin-  
17 derived *Sarbecoviruses* show the greatest similarity to SARS-CoV-2. The analysis provided a measure  
18 of total proteome similarity and showed that a small subset of bat *Sarbecoviruses* are closely related  
19 but unlikely to be the direct source of SARS-CoV-2. Spike analysis reveals that the current SARS-CoV-  
20 2 variants of concern have sampled only 36% of the possible spikes changes which have occurred  
21 historically in *Sarbecovirus* evolution. It is likely that new SARS-CoV-2 variants with changes in these  
22 regions are compatible with virus replication and are to be expected in the coming months, unless global  
23 viral replication is severely reduced.

24

## 25 Introduction

26 Since the first report of Coronavirus Disease 2019 (COVID-19) caused by SARS-CoV-2 in  
27 December 2019 in Wuhan city, China(1)(2) and the World Health Organisation declaring COVID-19 a  
28 global pandemic in March 2020, the disease has continued to affect every part of the world. The SARS-  
29 CoV-2 virus belongs to the *Coronaviridae* family of enveloped positive-sense single-stranded RNA  
30 viruses, *Betacoronavirus* genus, *Sarbecovirus* subgenus. Other *Sarbecoviruses* include SARS-CoV  
31 (the coronavirus causing the SARS outbreak in 2002-2004) and a large number of SARS-like bat  
32 viruses that have been identified. The genomes of *Sarbecoviruses* are 30kb in length, encoding >14  
33 open reading frames (ORFs). Among the structural proteins, the spike protein plays a crucial role in the  
34 virus cell tropism, host range, cell entrance and infectivity and is considered the main protein target for  
35 the host immune response. Other ORFs encode for accessory proteins, many of which modulate host  
36 responses to infection. Investigation of the evolutionary history of SARS-CoV-2 show a clear link to  
37 *Sarbecoviruses* from bats although no direct animal precursor for SARS-CoV-2 has been identified (3)  
38 (4) (5) (6) (7). We sought to identify unique peptide regions of SARS-CoV-2 compared to all available  
39 *Sarbecoviruses* to determine the features that might have allowed SARS-CoV-2 to replicate and

40 transmit efficiently in humans. Comparative analyses of viral proteins would aid in better understanding  
41 of virus biology and pathology, providing insights into the origin of the virus and the conditions that led  
42 to its zoonosis to humans, efficient spread without the need for adaptation, as well as providing leads  
43 for drug and immune targets for effective treatments.

44

## 45 Results and Discussion

46 **Protein domains and profile hidden Markov models.** We have explored the genomes across  
47 the *Sarbecovirus* subgenus using profile hidden Markov models (pHMMs) based on viral proteins  
48 which provide a statistical description of the properties of amino acid sequences of viral proteins. The  
49 differences in pHMMs between virus genomes can reveal differences among viral proteins (8) (9).  
50 Efficient tools for preparing and comparing pHMMs are available with HMMER-3 (10) and the method  
51 is useful for comparing large or difficult to align genomes and for identifying changes in functional  
52 regions of the genomes. We have recently used these methods to identify and classify diverse  
53 coronaviruses in the *Coronaviridae* family (11) and to explore large and unwieldy genomes such as  
54 those from the African Swine Fever Virus (12). These methods were employed here to explore the  
55 relationship between SARS-CoV-2 and the other known *Sarbecoviruses* to gain understanding of their  
56 evolutionary history.

### a. Prepare Agnostic Domains from a small set of early SARS-CoV-2 genomes

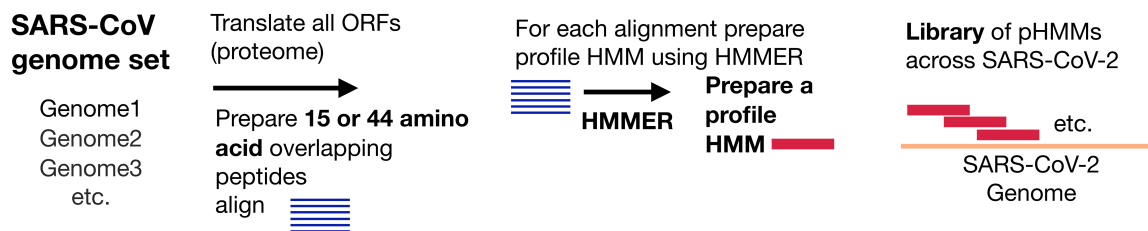

### b. Use library to query related Sarbecovirus genomes

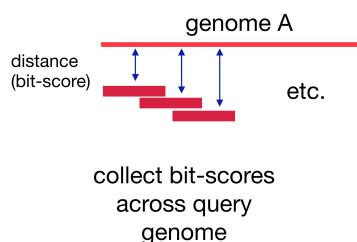

### c. Identify protein domains (15 or 44 amino acids) that show differences from early SARS-CoV-2

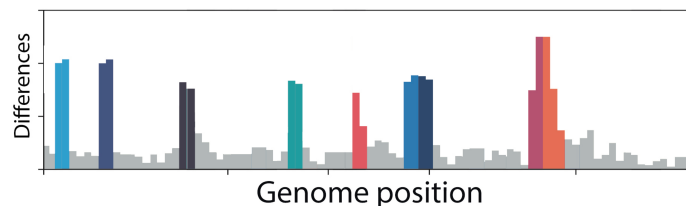

57

58 **Figure 1. Analysis scheme.** (A) Profile Hidden Markov Model (pHMM) domains were generated from  
59 a set of 35 early lineage B SARS-CoV-2 genome sequences. All open reading frames were translated  
60 and then sliced into either 44 amino acid peptides with a step size of 22 amino acids or 15 amino acid  
61 peptides with a step size of 8 amino acid. The peptides were clustered using Uclust (13), aligned with  
62 MAFFT (14) and then each alignment was built into a pHMM using HMMER-3 (10). (B) The set of  
63 pHMMs were used to query *Sarbecovirus* genome sequences, bit scores were collected as a  
64 measure of similarity between each pHMM and the query sequence. (C) Bit-scores were gathered and  
65 analyzed to detect regions that differ between early SARS-CoV-2 genomes and query genomes.

66

67 **Genome scans using custom pHMM domains.** We generated overlapping 44 or 15 amino  
68 acid (aa) alignments of all SARS-CoV-2 encoded proteins derived from a set of 35 lineage B SARS-

69 CoV-2 genomes from early in the pandemic and then prepared pHMMs from each alignment (see Figure  
70 1). The resulting libraries of pHMMs were then used to survey variations across all *Sarbecoviruses*  
71 relative to the initial SARS-CoV-2 found in human cases in late 2019/early 2020.

72 Using this method, ten early SARS-CoV-2 genomes were compared to a representative subset  
73 of 29 *Sarbecovirus* genomes obtained from humans, bats, civet cats and pangolins (Figure 2) selected  
74 after applying the same analysis to all available *Betacoronavirus* genomes to ensure that we were not  
75 missing any unexpectedly close viral genome regions (results not shown). For each query genome, the  
76 bit-score from the corresponding pHMM from early B lineage SARS-CoV-2 were accumulated and  
77 hierarchical clustering based on the normalized domain bits-scores was performed. The bit-score  
78 describes the similarity between the 44aa (or 15aa) query sequence and the related sequence from  
79 early SARS-CoV-2. The central region of the *Sarbecovirus* genome is conserved across the genome  
80 set with all domains marked as dark or light grey in the Figure 2A clustermap indicating normalized bit-  
81 scores close to 1. This is not unexpected as this central genomic region spans nsp5 to nsp16 proteins  
82 encoding the viral polymerase, other enzymes and non-surface exposed structural proteins of the virus,  
83 which are presumably more constrained and less likely to change than other regions of the virus. In  
84 contrast, the domains displayed in yellow, orange and red in Figure 2A indicate more increasingly  
85 divergent regions between SARS-CoV-2 and the query *Sarbecovirus* genomes (much lower normalized  
86 bit scores). For each domain across the proteome, a measure of the difference between the query and  
87 SARS-CoV-2 domain (1-mean bit-score) was plotted to identify regions that differed extensively across  
88 the *Sarbecoviruses* genome set (Figure 2B). Further details on the relationship between amino acid  
89 changes across a genome or gene set and the metric 1-mean bit-score are found in the Supplemental  
90 Figure 1. The higher 1-mean bit-score values ( $\geq 0.3$ ) were found in nsp2, nsp3, nsp4, spike and orf8  
91 and orf9N (Figure 2B), indicating that these proteins differ in the set of SARS-CoV-2 and closely related  
92 *Sarbecoviruses*. These regions may be dispensable, flexible and can tolerate change and may be  
93 products of neutral evolution they may differ because selective pressure has resulted in new functional  
94 roles or immune escape.

95  
96

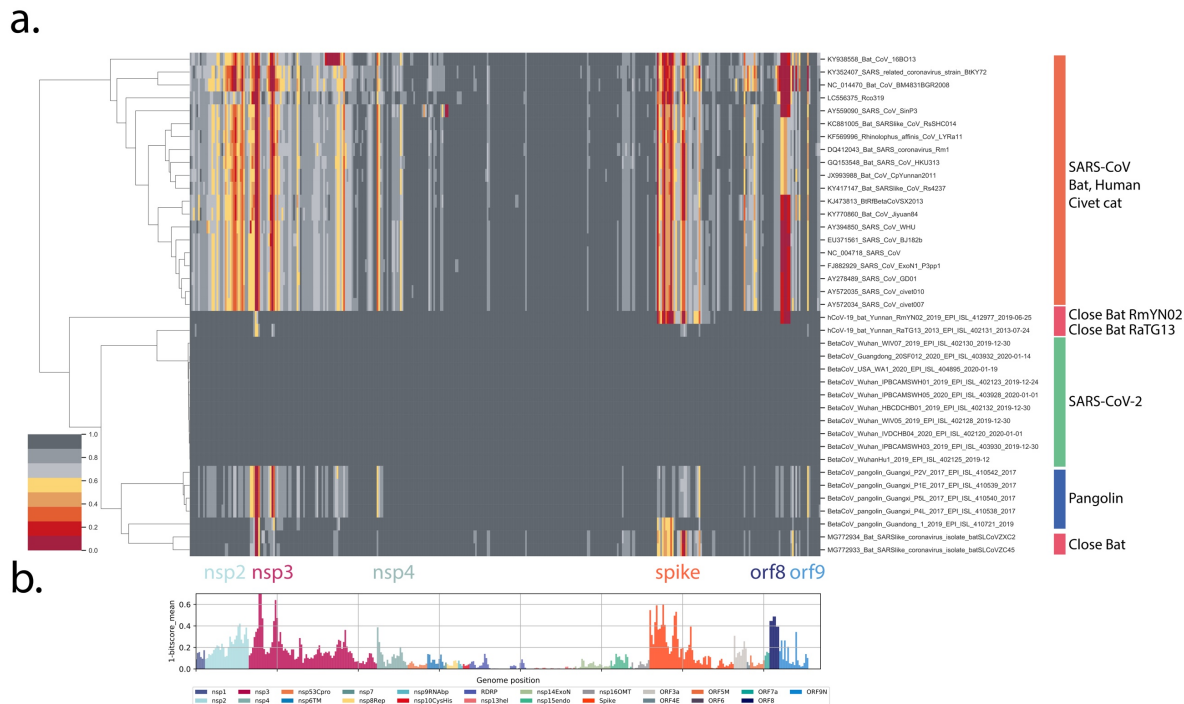

97

98 **Figure 2. Proteome differences in SARS-CoV-2 vs close Bat, Human and Civet**  
 99 **Sarbecoviruses.** All forward open reading frames from the 35 early lineage B SARS-CoV-2 genomes  
 100 were translated, and processed into 44 aa peptides (with 22 aa overlap), clustered at 0.65 identity using  
 101 Uclust (11), aligned with MAAFT (12) and converted into pHMMs using HMMER-3 (10). The presence  
 102 of these domains was sought in a set of *Sarbecovirus* genomes plus the SARS-CoV-2 genomes and  
 103 genomes were then clustered using hierarchical clustering based on the normalized domain bit-scores  
 104 (e.g. the similarity of the identified query domain to the reference lineage B SARS-CoV-2 domain). Each  
 105 row represents a genome, each column represents a domain. Domains are displayed in their order  
 106 across the SARS-CoV-2 genome, Red = low normalized domain bit-score (lower similarity to lineage B  
 107 SARS-CoV-2) = distant from SARS-CoV-2, Darkest grey = normalized domain bit-score = 1 = highly  
 108 similar to lineage B SARS-CoV-2. Groups of coronaviruses were indicated to the right of the figure. **(A)**  
 109 Domain differences across the *Sarbecovirus* subgenus. **(B)** For each domain the mean bit-score was  
 110 calculated across the entire set of *Sarbecovirus* genomes and the value 1-mean bit-score was plotted  
 111 for each domain. Domains are coloured by the proteins from which they were derived with the colour  
 112 code indicated below the figure.

113

114

115 The role of pangolins as an amplifying intermediate host of SARS-CoV-2 is important to  
 116 document securely, to guide efforts to prevent or prepare for future zoonotic events. A small number of  
 117 *Sarbecoviruses* have been identified in samples from trafficked pangolins in China (15) (7) (16), yet  
 118 there is no direct evidence that pangolins host the virus in their natural environment. It remains possible  
 119 that the positive pangolins identified in China were infected by viruses encountered after transport to  
 120 China. Five CoV sequences from pangolins were included in this analysis (Figure 2), including four  
 121 (EPI\_ISL\_410538,-39,-40,-42) generated by Lam *et al.* (7) after sequencing the original samples  
 122 described by Liu *et al.*(15); a 5th genome (Guandong\_1\_2019\_EPI\_ISL\_410721\_2019) deposited by  
 123 Xiao *et al.* (16) was included despite unclear progeny for this sequence (17). Four additional CoV  
 124 sequences from pangolins from GISAID were excluded due to excessive gaps in the sequence which  
 125 precluded the domain analysis. Overall, the pangolin CoVs show many genomic regions of very close

126 domain homology although the overall similarity across the entire genome is not close enough to  
127 support of direct pangolin-human jump as the source of SARS-CoV-2 (see below).

128 A number of closely related *Sarbecoviruses* have been reported in bats (18) (19). We focused  
129 on the four bat *Sarbecoviruses* with closest similarity to SARS-CoV-2 (close bats: RaTG13, RmYn02,  
130 MG772933,34). The clustermap and variance analysis (Figure 2A) showed higher similarity across most  
131 of the genome (dark grey sectors) with three proteins (nsp3, spike and orf9) displaying high reduced  
132 bit-scores from the SARS-CoV-2 sequences (Figure 2A, close bats, yellow/red domains). These limited  
133 regions that differ between the 4 closely related bat *Sarbecoviruses* and SARS-CoV-2 indicate virus  
134 elements that needed to adjust to human transmission. The spike differences have been explored in  
135 detail (refs and see below) however it may be important to consider nsp3 and orf9 changes in the  
136 complete analysis.

137 **Spike changes with 15 amino acid domains.** To provide more detailed resolution, 15 amino  
138 acid pHMMs across the early lineage B spike protein were prepared and used to examine changes  
139 across the set of close *Sarbecoviruses* and SARS-CoV-2 (Figure 3). The regions of change observed  
140 in the spike protein show an expanded version of the total proteome pattern observed in Figure 2 plus  
141 additional details. Adding the current knowledge of SARS-CoV-2 spike evolution reveals some  
142 important patterns. The S1 domain of spike (the amino-terminal half of the protein) tolerates at large  
143 amount of change with most of the low score domains (red) concentrated here (Figure 3A), consistent  
144 with the surface exposure of the S1 region, and driven by pressure to avoid immune responses which  
145 in turn require the virus to maintain a malleable structure in the exposed S1. Except for the  
146 Guangdong\_1 pangolin and RatG13 spikes, the central ACE2 receptor binding region is very different  
147 between the close *Sarbecoviruses* and SARS-CoV-2. The furin cleavage site at the junction between  
148 the S1 and S2 domains is also a region showing a lot of malleability in the *Sarbecovirus* spikes (Figure  
149 3A) and is completely unique to SARS-CoV-2. This has been discussed in detail (20) and is also a site  
150 of frequent change in the current SARS-CoV-2 Variant of Concern (VOC) spike sequence with Q677,  
151 P681 and T717 flanking the furin site showing changes (Figure 3B).

152 Thirdly, the amino acid changes that have accumulated in the VOC spike protein are marked  
153 in color (Figure 3B) and cluster in regions with high variation (1-mean bit-score > 0.3) suggesting that  
154 *Sarbecoviruses* have made changes in these regions in previous evolutionary periods and are  
155 continuing to change in SARS-CoV-2 evolution. If all domains with 1-mean bit-score of 0.3 and above  
156 tolerate change in the current SARS-CoV-2 spike protein, this suggests that SARS-CoV-2 has many  
157 additional changes available for future immune evasion. Important regions that show high levels of  
158 historical change are RBD, the furin cleavage site and flanking regions and the NTD.

159

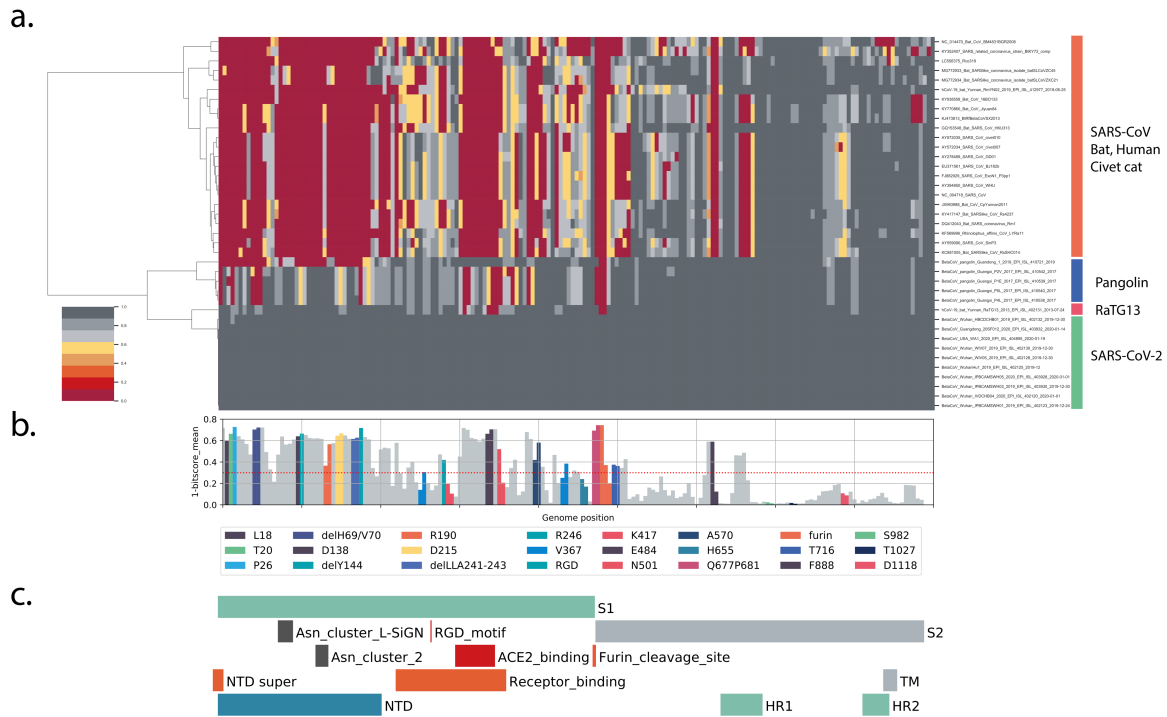

160

161 **Figure 3. Spike differences in SARS-CoV-2 vs close Bat, Human and Civet cat Sarbecoviruses.**

162 All forward spike open reading frames from the 35 early lineage B SARS-CoV-2 genomes were  
 163 translated, and processed into 15 aa peptides (with 8 aa overlap) and processed into an pHMM library  
 164 as described in Figure 2. (A) shows a hierarchical clustering of 15 amino acid domain bit-scores. (B)  
 165 shows the 1-mean of each domain bit-scores across the genome set, domain values, individual  
 166 domains that span known amino acid changes in the 5 VOC are colored (see key below panel B). (C)  
 167 The locations of important spike protein features are indicated. NTD: N-terminal domain, RBD: receptor-  
 168 binding domain, S1: spike 1, S1: Spike 2, TM: transmembrane domain, HR1: helical repeat 1, HR2:  
 169 helical repeat 2, NTD super: N-terminal domain supersite.

170

171

172 **Global proteome similarities.** A measure of the total protein distance between the SARS-  
 173 CoV-2 and any query *Sarbecovirus* can be obtained by summing the normalized bit-scores (SNBS)  
 174 across the entire query proteome. The encoded proteomes from more distant viruses will show lower  
 175 SNBS values. We examined SNBSs grouped by virus host for both the 44 amino acid total genome  
 176 analysis as well as the 15 amino acid spike gene analysis. Overall, the patterns showed that the  
 177 similarity to SARS-CoV-2 follows the order Pangolin > Bat > human=civet cat (Figure 4) although the  
 178 small set of close bat *Sarbecoviruses* show some exceptions. Of special interest, the bat coronavirus  
 179 genome RaTG13 (GenBank MN996532.1) was identified as closely related to the SARS-CoV-2 lineage  
 180 {Citation} and supports a bat coronavirus being the zoonotic source of the epidemic, although the  
 181 genetic distance is too far for RaTG13 itself to be a direct source of the pandemic SARS-CoV-2 virus  
 182 (21)(3). Another close bat coronavirus RmYN02, shows some regions of close identity to SARS-CoV-2  
 183 (6), yet overall it is more distant from SARS-CoV-2 than the strain RaTG13 (Figure 4A) due its possible  
 184 recombinant nature. A single pangolin derived SARS-CoV-2 (Guangdong\_1) showed an SNBS value  
 that was also elevated but not as high as the RaTG13 (Figure 4a), the 15 aa spike analysis showed

185 similar patterns except that only the RaTG13 spike displayed the high similarity to SARS-CoV-2 (Figure  
 186 4b).  
 187

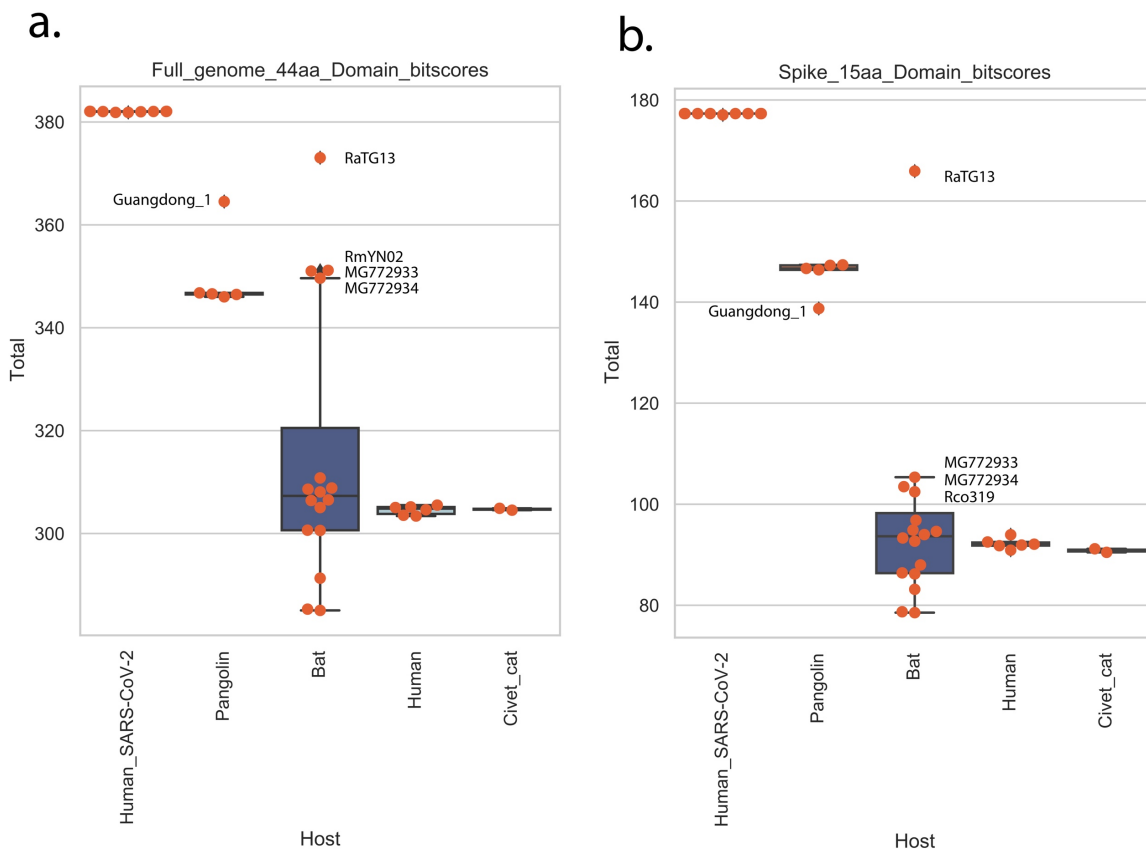

188  
 189  
 190 **Figure 4.** Total domain distances between virus groups. Normalized bit-score sums (NBSS) grouped  
 191 into SARS-CoV-2 and *Sarbecoviruses* from pangolin, bat, human and civet cat NBSS for all domains  
 192 for each genome were summed. The boxplot shows individual values marked in orange, median values  
 193 indicated by horizontal black lines, 1st interquartile ranges marked with a box. The identities of several  
 194 high scoring bat and pangolin genomes are indicated. **(A)** NBSS for 44 aa domains across the entire  
 195 coronavirus genome. **(B)** NBSS for 15 aa domains across the spike protein.

196  
 197 **Conclusions**

198 What is special about SARS-CoV-2? Spike changes in SARS-CoV-2 compared to a large set  
 199 of known *Sarbecovirus* indicate that the immediate zoonotic source of SARS-CoV-2 is yet to be  
 200 identified and reinforces the unique nature of the SARS-CoV-2 genome. The more global analysis of  
 201 spike regions in SARS-CoV-2 genomes (Figure 3) revealed the changes that have occurred across the  
 202 *Sarbecoviruses*. Combined with the current VOC spike changes, the patterns suggest that SARS-CoV-  
 203 2 has a great deal of evolutionary possibilities to avoid immune pressure. This suggests that genomic  
 204 variant surveillance should continue and vaccine producers should be prepared to accommodate such  
 205 spike changes in the next generation of vaccine updates. In addition to the spike protein, additional  
 206 regions of high variance were observed in the nsp3 across all *Sarbecoviruses* (Figure 2) in close bat  
 207 and pangolins (Figure 3). The high variance regions flanked and partially overlapped the Macro domain,  
 208 which is frequently associated with ADP-deribosylase activity (22)(23). Variance observed in the ORF8

209 changes across the set was due to frequent deletion of this ORF, suggesting that the encoded protein  
210 may be dispensable for human infection. Similar loss of ORF8 was observed with the original SARS-  
211 CoV (24) (25) and has been observed in several SARS-CoV-2 lineages as the virus adapted to humans  
212 (26) (27) (28). The ORF9 (N protein) variance observed across *Sarbecoviruses* and the changes in this  
213 protein in VOC strains suggest an additional region that may be adapting to human replication. The  
214 regions of variance identified here may indicate either functional changes in SARS-CoV-2 proteins or  
215 amino acid positions that can be changed without impairing the necessary functions of the protein. The  
216 relatively high mutation rate of SARS-CoV-2 combined with the unprecedented number of SARS-CoV-  
217 2 infections in the world is resulting in massive viral adaptation. Additional experiments are required to  
218 distinguish true functional changes from neutral evolution.

219 Finally, the detailed spike analysis of Figure 3 reveals 82 domains of 15-aa that have shown  
220 high variation (1-mean bit-score $\geq$  0.3) in the *Sarbecoviruses* while 29 of these domains show changes  
221 in VOC relative to early lineage B SARS-CoV-2. In broad terms, the SARS-CoV-2 evolution observed  
222 in the current VOC has sampled only 36% (29/82) of the possible spikes changes which have occurred  
223 historically in *Sarbecovirus* evolution. It is highly likely that a large number of new SARS-CoV-2 variants  
224 with changes in these regions are possible, compatible with virus replication and expected in the coming  
225 months, unless global viral replication is severely reduced.

226

## 227 **Acknowledgements**

228 We thank all global SARS-CoV-2 sequencing groups for their open and rapid sharing of sequence  
229 data and GISAID for providing an effective platform for making these data available. The study is funded  
230 by the Wellcome, DFID - Wellcome Epidemic Preparedness – Coronavirus (AFRICO19, grant  
231 agreement number 220977/Z/20/Z) awarded to MC. DLR and MC receive funding from the MRC  
232 (MC\_UU\_1201412).

233

## 234 **References**

- 235 1. Li,Q., Guan,X., Wu,P., Wang,X., Zhou,L., Tong,Y., Ren,R., Leung,K.S.M., Lau,E.H.Y., Wong,J.Y., *et al.* (2020)  
236 Early Transmission Dynamics in Wuhan, China, of Novel Coronavirus–Infected Pneumonia. *N. Engl. J.*  
237 *Med.*, 10.1056/NEJMoa2001316.
- 238 2. Yang,X., Yu,Y., Xu,J., Shu,H., Xia,J., Liu,H., Wu,Y., Zhang,L., Yu,Z., Fang,M., *et al.* (2020) Clinical course and  
239 outcomes of critically ill patients with SARS-CoV-2 pneumonia in Wuhan, China: a single-centered,  
240 retrospective, observational study. *Lancet Respir. Med.*, 10.1016/S2213-2600(20)30079-5.
- 241 3. Andersen,K.G., Rambaut,A., Lipkin,W.I., Holmes,E.C. and Garry,R.F. (2020) The proximal origin of SARS-CoV-  
242 2. *Nat. Med.*, 10.1038/s41591-020-0820-9.
- 243 4. Boni,M.F., Lemey,P., Jiang,X., Lam,T.T.-Y., Perry,B.W., Castoe,T.A., Rambaut,A. and Robertson,D.L. (2020)  
244 Evolutionary origins of the SARS-CoV-2 sarbecovirus lineage responsible for the COVID-19 pandemic.  
245 *Nat. Microbiol.*, **5**, 1408–1417.
- 246 5. Zhang,T., Wu,Q. and Zhang,Z. (2020) Probable Pangolin Origin of SARS-CoV-2 Associated with the COVID-19  
247 Outbreak. *Curr. Biol.*, 10.1016/j.cub.2020.03.022.



- 248 6. Zhou,H., Chen,X., Hu,T., Li,J., Song,H., Liu,Y., Wang,P., Liu,D., Yang,J., Holmes,E.C., *et al.* (2020) A novel bat  
249 coronavirus reveals natural insertions at the S1/S2 cleavage site of the Spike protein and a possible  
250 recombinant origin of HCoV-19 *Microbiology*.
- 251 7. Lam,T.T.-Y., Jia,N., Zhang,Y.-W., Shum,M.H.-H., Jiang,J.-F., Zhu,H.-C., Tong,Y.-G., Shi,Y.-X., Ni,X.-B., Liao,Y.-S.,  
252 *et al.* (2020) Identifying SARS-CoV-2-related coronaviruses in Malayan pangolins. *Nature*, **583**, 282–  
253 285.
- 254 8. Eddy,S.R. (1998) Profile hidden Markov models. *Bioinformatics*, **14**, 755–763.
- 255 9. Eddy,S.R. (1996) Hidden Markov models. *Curr. Opin. Struct. Biol.*, **6**, 361–365.
- 256 10. Eddy,S.R. (2011) Accelerated Profile HMM Searches. *PLOS Comput. Biol.*, **7**, e1002195.
- 257 11. Phan,M.V.T., Ngo Tri,T., Hong Anh,P., Baker,S., Kellam,P. and Cotten,M. (2018) Identification and  
258 characterization of Coronaviridae genomes from Vietnamese bats and rats based on conserved  
259 protein domains. *Virus Evol.*, **4**.
- 260 12. Masembe,C., Phan,M.V.T., Robertson,D.L. and Cotten,M. (2020) Increased resolution of African Swine  
261 Fever Virus genome patterns based on profile HMM protein domains *Genomics*.
- 262 13. Edgar,R.C. (2010) Search and clustering orders of magnitude faster than BLAST. *Bioinformatics*, **26**, 2460–  
263 2461.
- 264 14. Katoh,K. and Standley,D.M. (2013) MAFFT Multiple Sequence Alignment Software Version 7:  
265 Improvements in Performance and Usability. *Mol. Biol. Evol.*, **30**, 772–780.
- 266 15. Liu,P., Chen,W. and Chen,J.-P. (2019) Viral Metagenomics Revealed Sendai Virus and Coronavirus Infection  
267 of Malayan Pangolins (*Manis javanica*). *Viruses*, **11**, 979.
- 268 16. Xiao,K., Zhai,J., Feng,Y., Zhou,N., Zhang,X., Zou,J.-J., Li,N., Guo,Y., Li,X., Shen,X., *et al.* (2020) Isolation of  
269 SARS-CoV-2-related coronavirus from Malayan pangolins. *Nature*, **583**, 286–289.
- 270 17. Chan,Y.A. and Zhan,S.H. (2020) Single source of pangolin CoVs with a near identical Spike RBD to SARS-CoV-  
271 2 *Genomics*.
- 272 18. Tang,X.C., Zhang,J.X., Zhang,S.Y., Wang,P., Fan,X.H., Li,L.F., Li,G., Dong,B.Q., Liu,W., Cheung,C.L., *et al.*  
273 (2006) Prevalence and Genetic Diversity of Coronaviruses in Bats from China. *J. Virol.*, **80**, 7481–7490.
- 274 19. Li,W. (2005) Bats Are Natural Reservoirs of SARS-Like Coronaviruses. *Science*, **310**, 676–679.
- 275 20. Hoffmann,M., Kleine-Weber,H. and Pöhlmann,S. (2020) A Multibasic Cleavage Site in the Spike Protein of  
276 SARS-CoV-2 Is Essential for Infection of Human Lung Cells. *Mol. Cell*, **78**, 779-784.e5.
- 277 21. Andrew Rambaut (2020) Divergence of nCoV-2019 to closest non-human relative. *Virological.org*.
- 278 22. Frick,D.N., Viridi,R.S., Vuksanovic,N., Dahal,N. and Silvaggi,N.R. (2020) Molecular Basis for ADP-Ribose  
279 Binding to the Mac1 Domain of SARS-CoV-2 nsp3. *Biochemistry*, **59**, 2608–2615.
- 280 23. Lei,J., Kusov,Y. and Hilgenfeld,R. (2018) Nsp3 of coronaviruses: Structures and functions of a large multi-  
281 domain protein. *Antiviral Res.*, **149**, 58–74.
- 282 24. Chiu,R.W.K., Chim,S.S.C., Tong,Y., Fung,K.S.C., Chan,P.K.S., Zhao,G. and Lo,Y.M.D. (2005) Tracing SARS-  
283 Coronavirus Variant with Large Genomic Deletion. *Emerg. Infect. Dis.*, **11**, 168–170.
- 284 25. Tang,J.W., Cheung,J.L.K., Chu,I.M.T., Sung,J.J.Y., Peiris,M. and Chan,P.K.S. (2006) The Large 386-nt Deletion  
285 in SARS-Associated Coronavirus: Evidence for Quasispecies? *J. Infect. Dis.*, **194**, 808–813.

- 286 26. Su, Y.C.F., Anderson, D.E., Young, B.E., Linster, M., Zhu, F., Jayakumar, J., Zhuang, Y., Kalimuddin, S., Low, J.G.H.,  
287 Tan, C.W., *et al.* (2020) Discovery and Genomic Characterization of a 382-Nucleotide Deletion in  
288 ORF7b and ORF8 during the Early Evolution of SARS-CoV-2. *mBio*, **11**, e01610-20,  
289 /mbio/11/4/mBio.01610-20.atom.
- 290 27. Gong, Y.-N., Tsao, K.-C., Hsiao, M.-J., Huang, C.-G., Huang, P.-N., Huang, P.-W., Lee, K.-M., Liu, Y.-C., Yang, S.-L.,  
291 Kuo, R.-L., *et al.* (2020) SARS-CoV-2 genomic surveillance in Taiwan revealed novel ORF8-deletion  
292 mutant and clade possibly associated with infections in Middle East. *Emerg. Microbes Infect.*, **9**, 1457–  
293 1466.
- 294 28. Young, B.E., Fong, S.-W., Chan, Y.-H., Mak, T.-M., Ang, L.W., Anderson, D.E., Lee, C.Y.-P., Amrun, S.N., Lee, B.,  
295 Goh, Y.S., *et al.* (2020) Effects of a major deletion in the SARS-CoV-2 genome on the severity of  
296 infection and the inflammatory response: an observational cohort study. *Lancet Lond. Engl.*, **396**,  
297 603–611.

298  
299

300 **Supplementary Figure 1** demonstrates the relationship between the 1-mean bit-score and amino acid  
301 changes across a sequence alignment. A set of twelve, 15 aa pHMM domains across the central region  
302 of the spike protein were used to demonstrate the relationship between the total amino acid changes  
303 and the resulting pHMM 1-mean bit-scores. An alignment of 38 spike proteins from 10 early SARS-  
304 CoV-2 genomes, 4 close bat coronavirus *Sarbecoviruses* plus 24 additional close *Sarbecoviruses* was  
305 prepared and trimmed to an 87 amino acid region spanning conserved and variable sequences across  
306 the furin cleavage site. The bit-scores(10) for the twelve, 15 aa pHMMs across each query sequence  
307 were gathered, and the mean value for each domain across the set was calculated and converted to a  
308 1-mean bit-score value for ease of visualization (higher value = greater difference from SARS-CoV-2).

309 The amino acid changes across the alignment are shown in Supplementary Figure 1 panel B.  
310 with each colored bar indicating an amino acid change (or gap, indicated in grey) from the spike of  
311 reference genome NC-045512, The 3' end of the spike S1, the furin cleavage site and the 5' start of the  
312 spike S2 region are indicated in Panel B. Peaks of variability are seen flanking and within the furin site  
313 and in the S2 region (Supplementary Figure 1 panel A). The 1-mean bit-score values for the 12 domains  
314 are plotted in Panel C. and show a related but more softened pattern of variation across the region. The  
315 advantage the pHMM method and the 1-mean bit-score metrics is that the score is weighted to reflect  
316 the type of amino acid change or insertion/deletions and can be determined quickly in large genome  
317 sets using the HMMER tools(10). For our comparative analysis, the cutoff of 0.3 for the 1-mean bit-  
318 score was set to reflect about 25 amino changes in the total aa positions covered by each domain query  
319 (15 aa domain across 38 sequences = 570 total position differences possible).

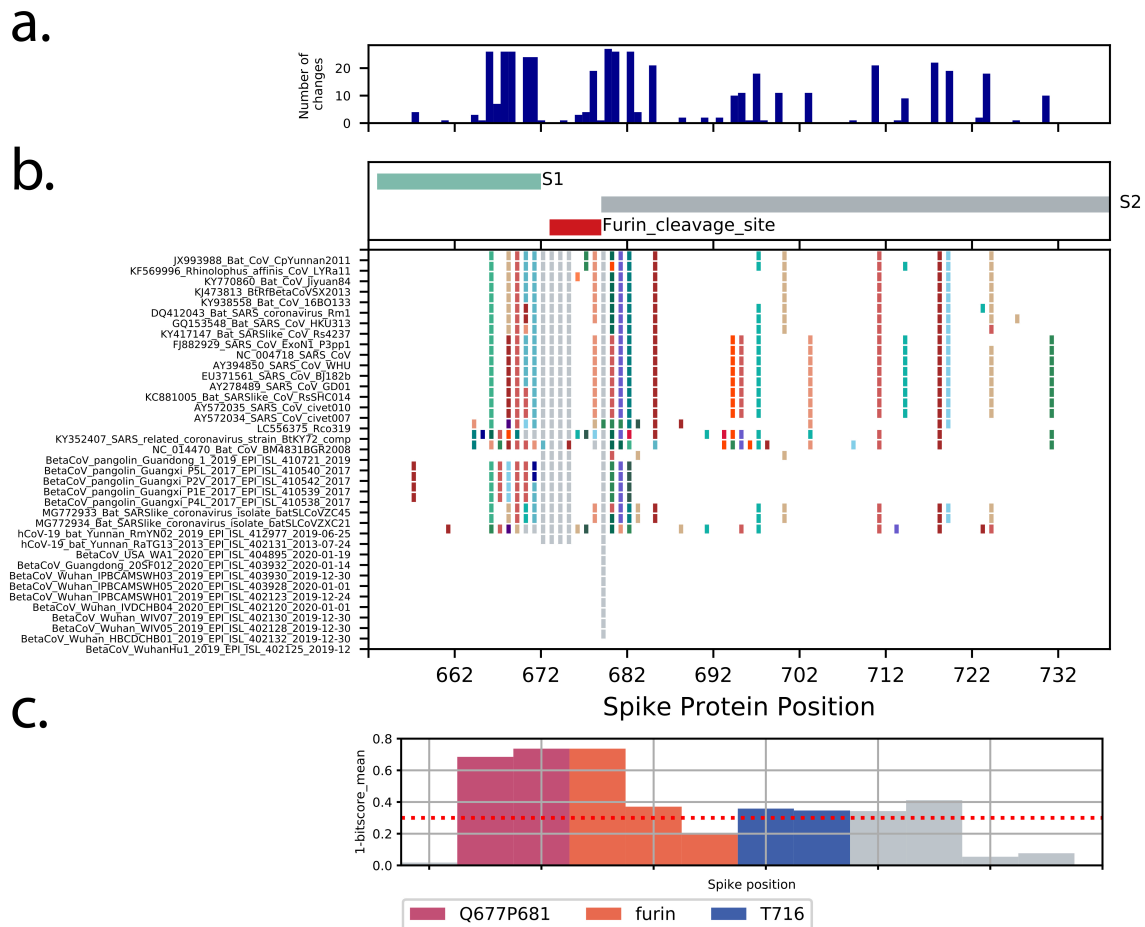

320

321 **Supplemental Figure 1. Demonstrating relationship between amino acid changes and 1-mean**  
 322 **bit score. (B)** The spike proteins encoded by the set of *Sarbecovirus* genomes examined in Figure 2  
 323 and 3 were aligned and the amino acid changes from the early SARS-CoV-2 genomes (= NC-045512  
 324 sequence) were depicted as colored lines across each sequence. **(A)** The total number of proteins  
 325 showing a change from the early SARS-CoV-2 genomes (NC-045512) were plotted for each position  
 326 of the alignment. **(C)** The set of 12, 15 aa pHMMs spanning the central region of the spike (a subset of  
 327 the pHMMs used for Figure 3) were used to examine the *Sarbecovirus* spike sequences. For each  
 328 pHMM, the mean bit-score for the entire sequence sequencer set was calculate and the value 1-mean  
 329 bit-score is plotted for each of the 12 pHMMs. Domains containing known amino acid changes in VOC  
 330 (Q677, P681, T716) and the domains spanning the furin cleavage site are indicated by color (with the  
 331 legend found below panel C).  
 332
